# Supplementary material for: Model-Free Estimation of Tuning Curves and Their Attentional Modulation, Based on Sparse and Noisy Data
Source: PLOS journal article supplement (doi:10.1371/journal.pone.0146500), 2016-01-19
Supplement: S6 (10.1371/journal.pone.0146500.s006) [file journal.pone.0146500.s006]

**Supporting Table S 2: List of features defined only for uni condition.**  
Each feature is calculated only for uni condition.

| Feature name                  | Description                                                                                                                      |
|-------------------------------|----------------------------------------------------------------------------------------------------------------------------------|
| CIRCULARVARIANCE <sup>a</sup> | $1 - \left  \frac{\sum_{\theta_n} \tilde{tc}(\theta_n) e^{2\pi i \theta_n / 360}}{\sum_{\theta_n} \tilde{tc}(\theta_n)} \right $ |

$${}^a \tilde{tc}(\theta) = \overline{tc(\theta)} - \min tc(\theta)$$
